# Supplementary material
Source: PubMed Central journal article supplement (PMC6641415)
Supplement: ao8b00123_si_001.pdf [file ao8b00123_si_001.pdf]

## Supplementary materials

### Prediction of Accurate Binding Modes using Combination of classical and accelerated Molecular dynamics and Free Energy Perturbation Calculations: An Application to Toxicity Studies

Filip Fratev\*<sup>1,2</sup>, Thomas Steinbrecher<sup>3</sup> and Svava Ósk Jónsdóttir<sup>4</sup>

<sup>1</sup> Department of Pharmaceutical Sciences, School of Pharmacy, The University of Texas at El Paso, 1101 N Campbell St, El Paso, TX 79902, USA

<sup>2</sup> Micar21 Ltd., Persenk 34B, 1407, Sofia, Bulgaria

<sup>3</sup> Schrödinger GmbH, Dynamostrasse 13, 68165 Mannheim, Baden-Württemberg, Germany

<sup>4</sup> insilTox ApS, Sverigesvej 20B, DK-2800 Kongens Lyngby, Denmark

\*Corresponding author e-mail: fratev@micar21.com, soj@insiltox.com

#### Supplemental materials:

Contain Supplementary table S1, figures S1-S8, Movie S1, Structural files (regular and induced fit docking outputs, first and last MD frame from cMD run 1 on PFuDA).

**Table S1:** Ligand names, 2D graphs and other basic information on the ligands studied

| Ligand name (abbreviation) | Ligand name              | Molecular weight [g/mol] | No. carbon atoms | 2D graph                                                                              |
|----------------------------|--------------------------|--------------------------|------------------|---------------------------------------------------------------------------------------|
| PFHxA                      | Perfluorohexanoic acid   | 314.05                   | 6                | 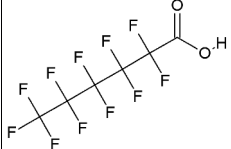   |
| PFHpA                      | Perfluoroheptanoic acid  | 364.06                   | 7                |    |
| PFOA                       | Perfluorooctanoic acid   | 414.07                   | 8                |    |
| PFNA                       | Perfluorononoic acid     | 464.08                   | 9                |   |
| PFDA                       | Perfluorodecanoic acid   | 514.09                   | 10               |  |
| PFuDA                      | Perfluoroundecanoic acid | 564.09                   | 11               |  |
| DA                         | Decanoic acid            | 172.27                   | 10               |  |

## Figures

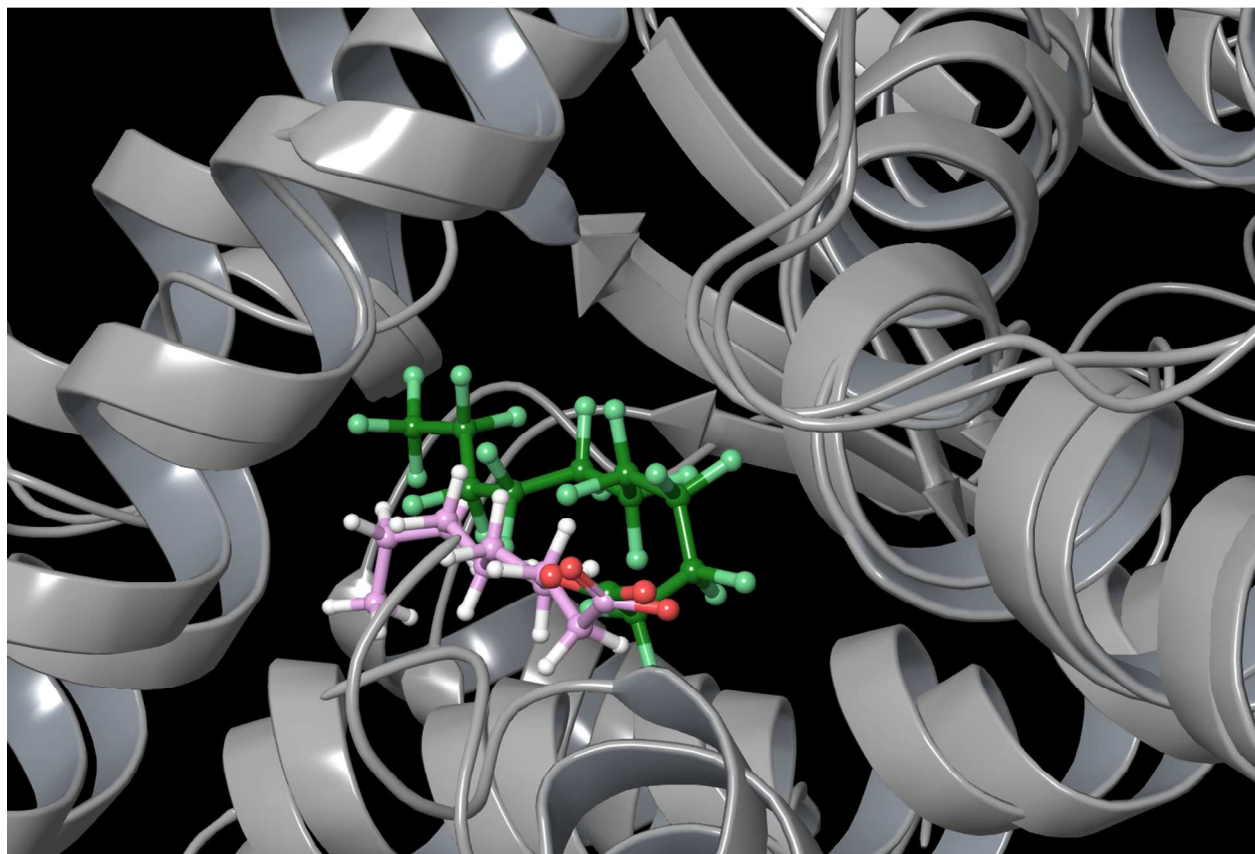

**Figure S1.** Comparison between the binding mode of DA (pink) obtained by X-ray crystallography and the most populated binding conformation (Binding mode 1) of PFuDA (green). The PFuDA conformation was obtained by averaging the cMD trajectories from 2x100 ns cMD simulations and subsequently the structure was minimized. Note that binding mode 1 is not the starting conformation.

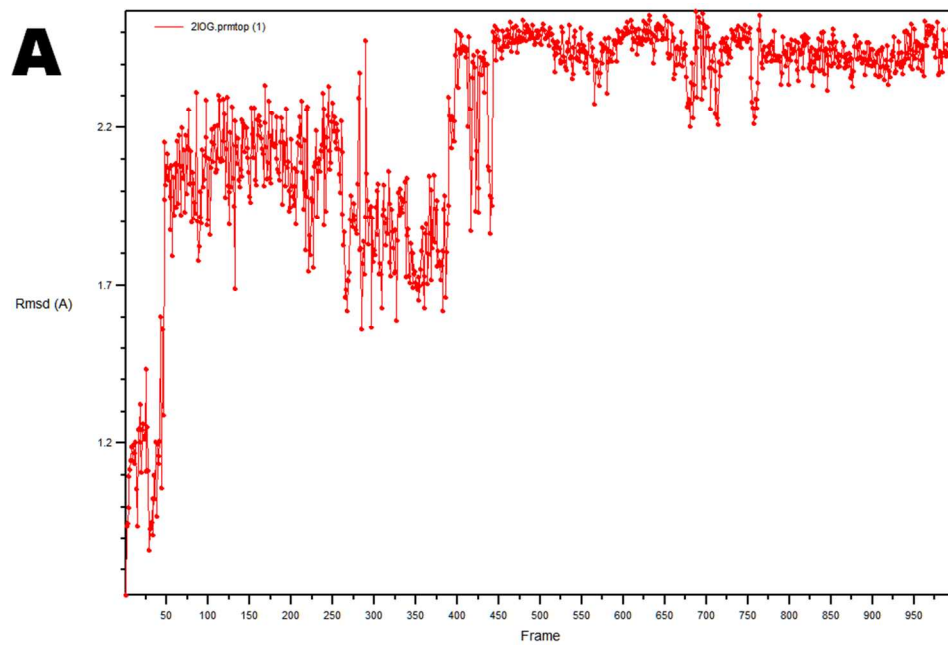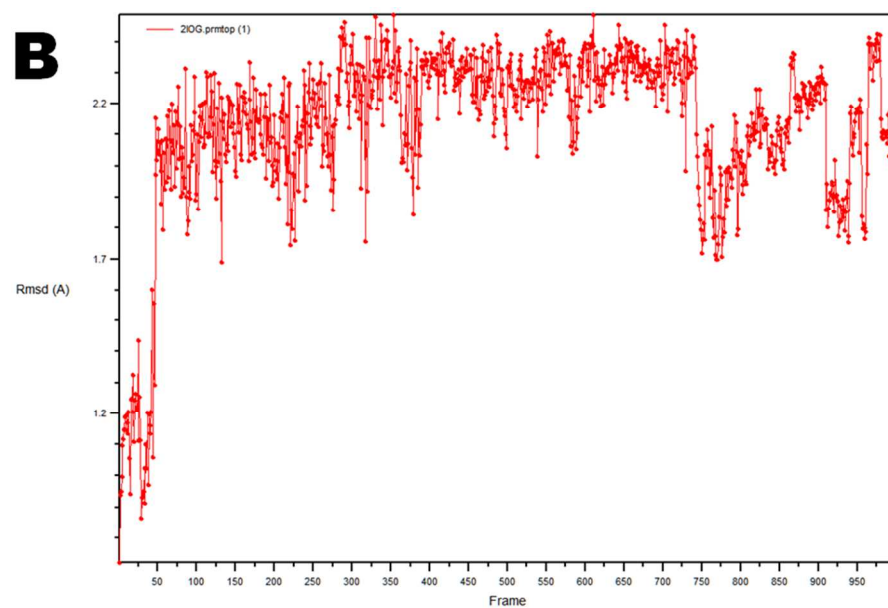

**Figure S2.** The RMSD of the PFuDA ligand during the cMD simulation (**A**) run1 and (**B**) run 2. 100 frames correspond to 10 ns, i.e. each simulation is 100 ns long. Note that the transitions at 5-50 ns (Binding mode 2) in run 1 and after 75 ns (Binding mode 3) are well visible.

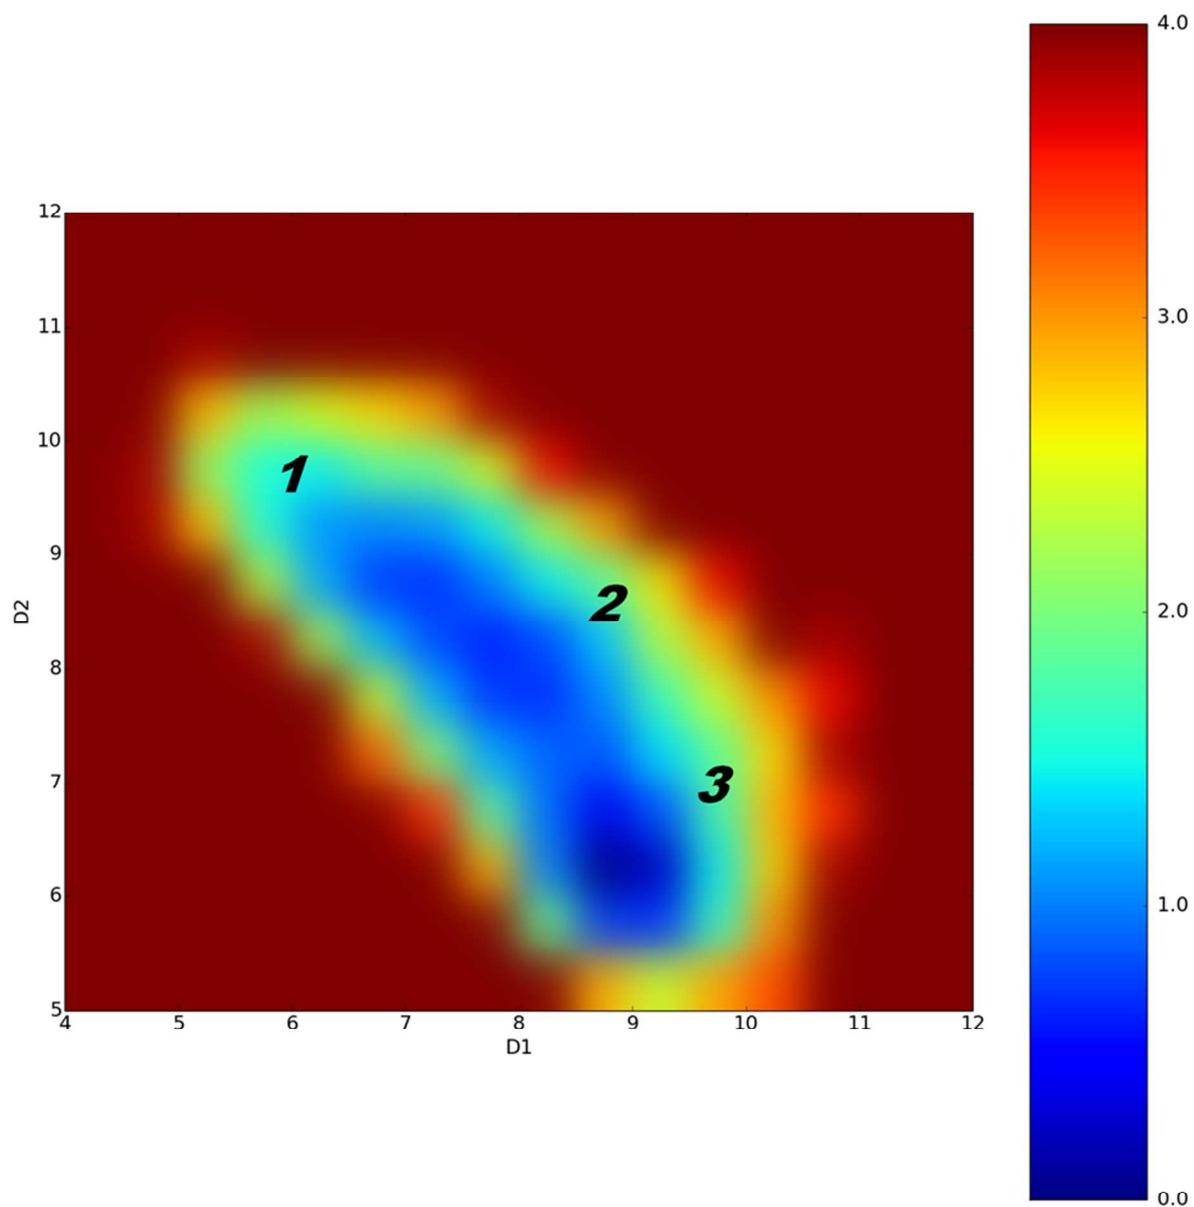

**Figure S3.** The free energy map of the PFOA conformations obtained by the combined 2x100 ns cMD simulations (in kcal/mol). D1 and D2 coordinates are the distances in Å between the carbon atom of the CF<sub>3</sub> group (the end of ligand) and the C $\alpha$  atoms of Phe282 (helix 3) and Tyr473 (helix 5), respectively.

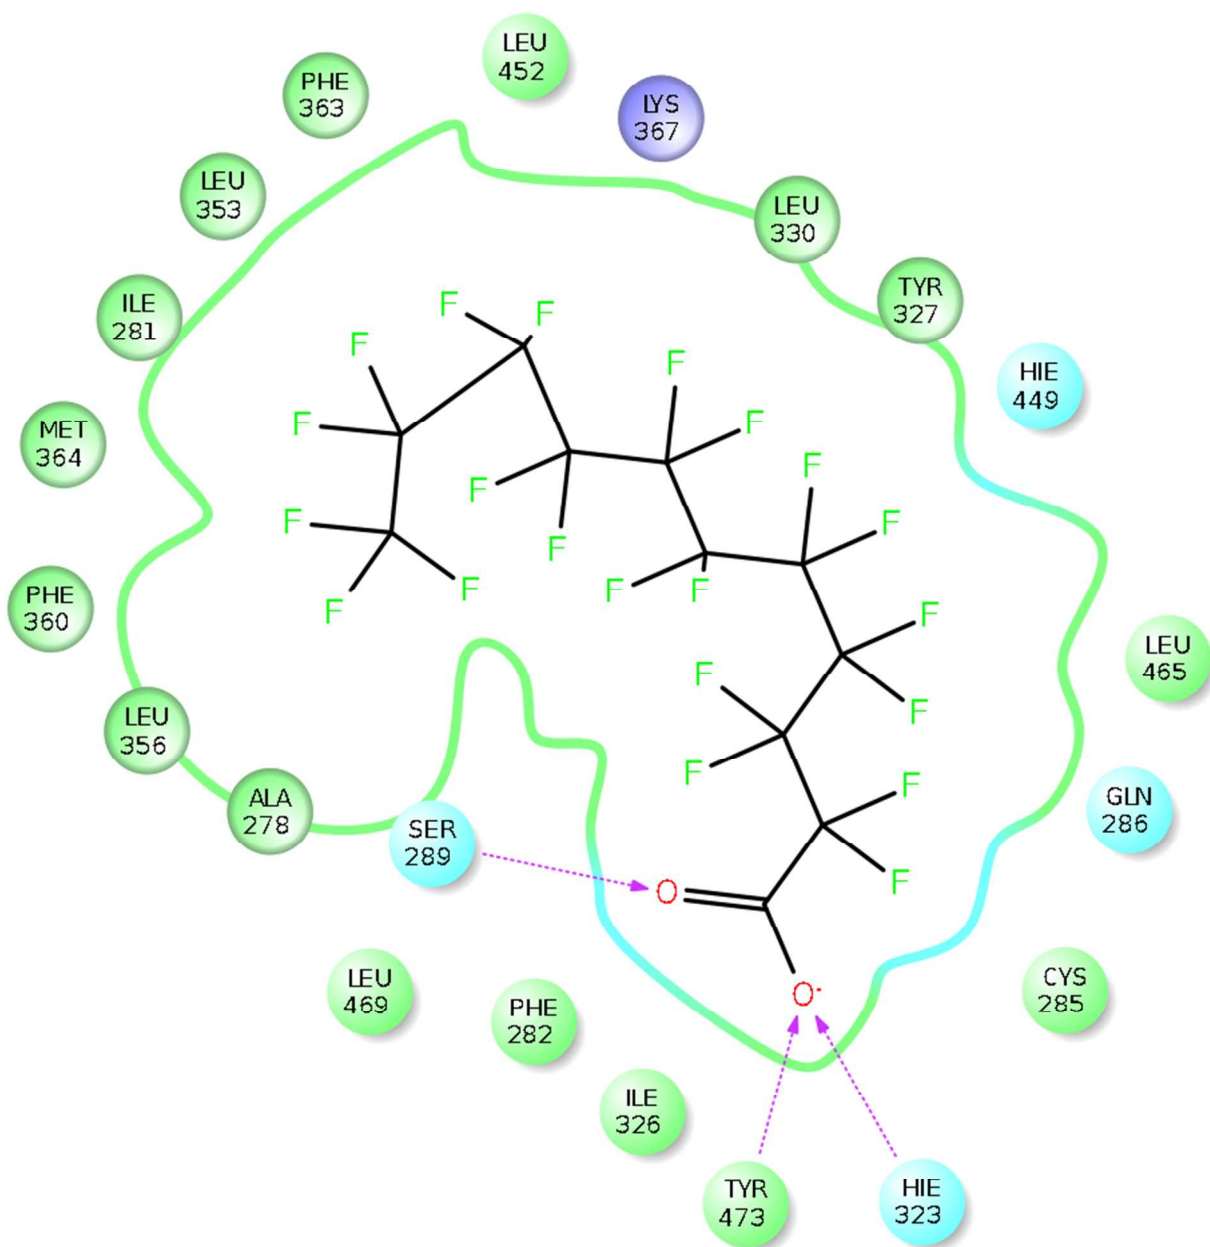

**Figure S4.** Detected PFuDA ligand-receptor interactions for cMD run 1 (130 ns simulation). The H-bonds are marked with dotted lines and the blue and green spheres show the areas of electrostatic and hydrophobic interactions, respectively.

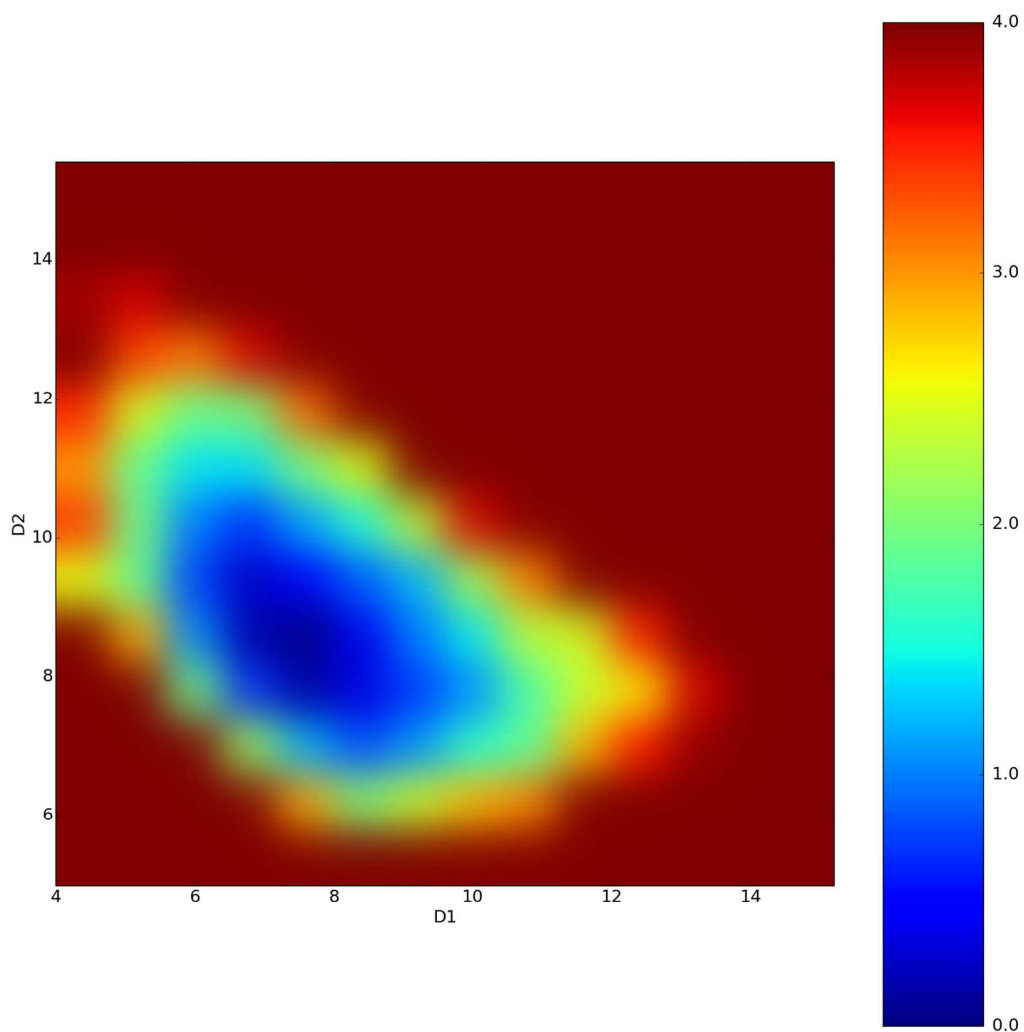

**Figure S5.** Reweighted free energy map of the PFOA conformations obtained by the combined aMD simulations (in kcal/mol). D1 and D2 coordinates are the distances in Å between the carbon atom of the CF<sub>3</sub> group (the end of ligand) and the C $\alpha$  atoms of Phe282 (helix 3) and Tyr473 (helix 5), respectively.

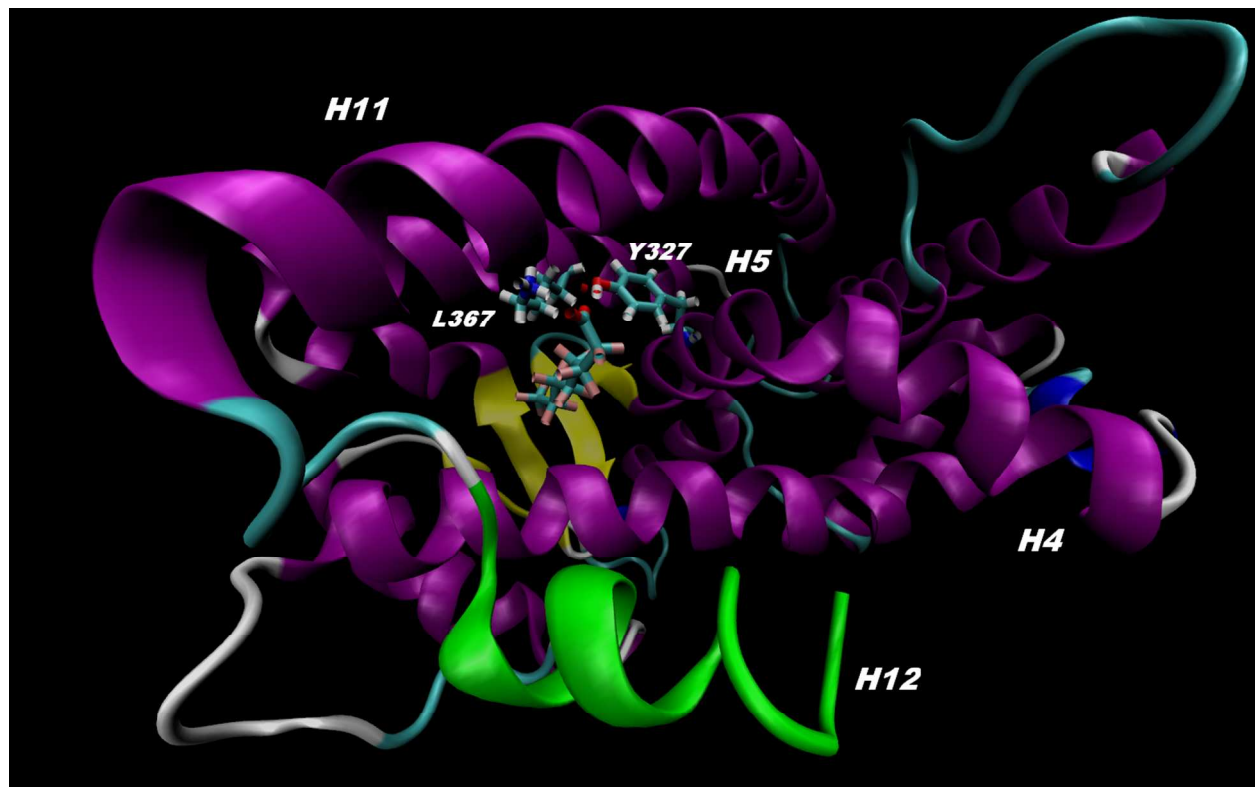

**Figure S6.** Antagonist H12 conformation detected during the movement of the PFOA ligand in the aMD simulation.



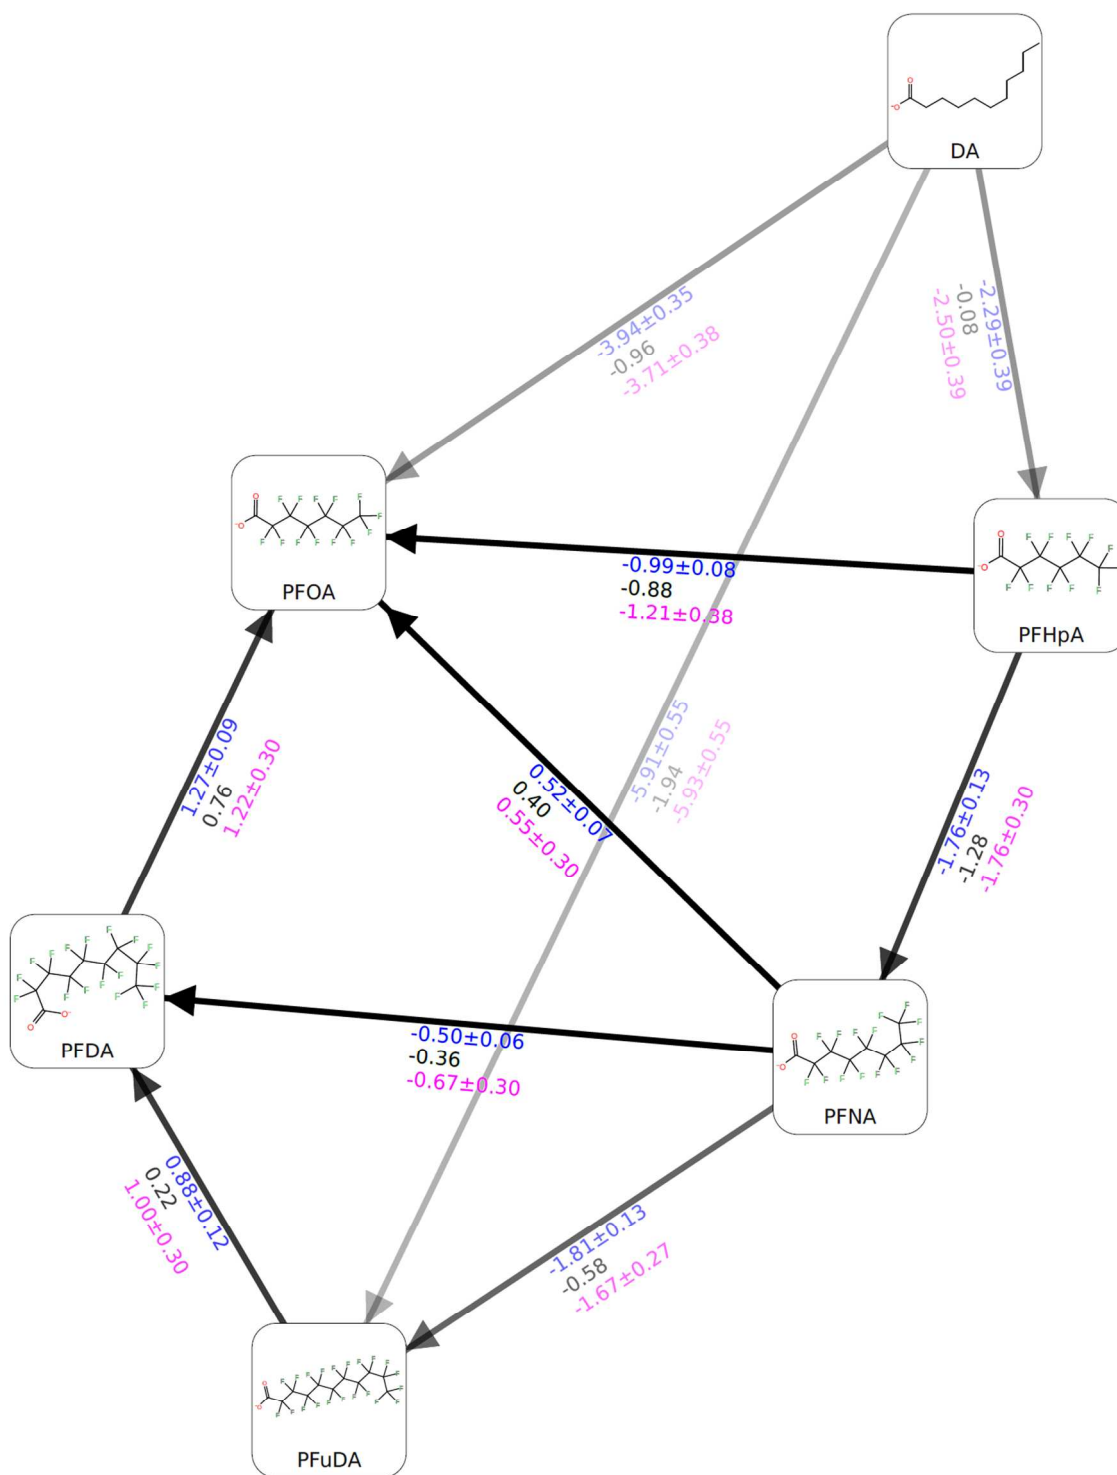

**Figure S7.** The FEP+ results based on the Rosiglitazone binding mode and 1FM6 pdb-structure. Predicted  $\Delta\Delta G$  values for each individual permutation are shown. The ligands experimental relative binding affinities  $\Delta\Delta G$  (kcal/mol), and the computed values by BAR (Bennett raw) and cycle closure estimation of  $\Delta\Delta G$  are written in black, blue and magenta color, respectively.

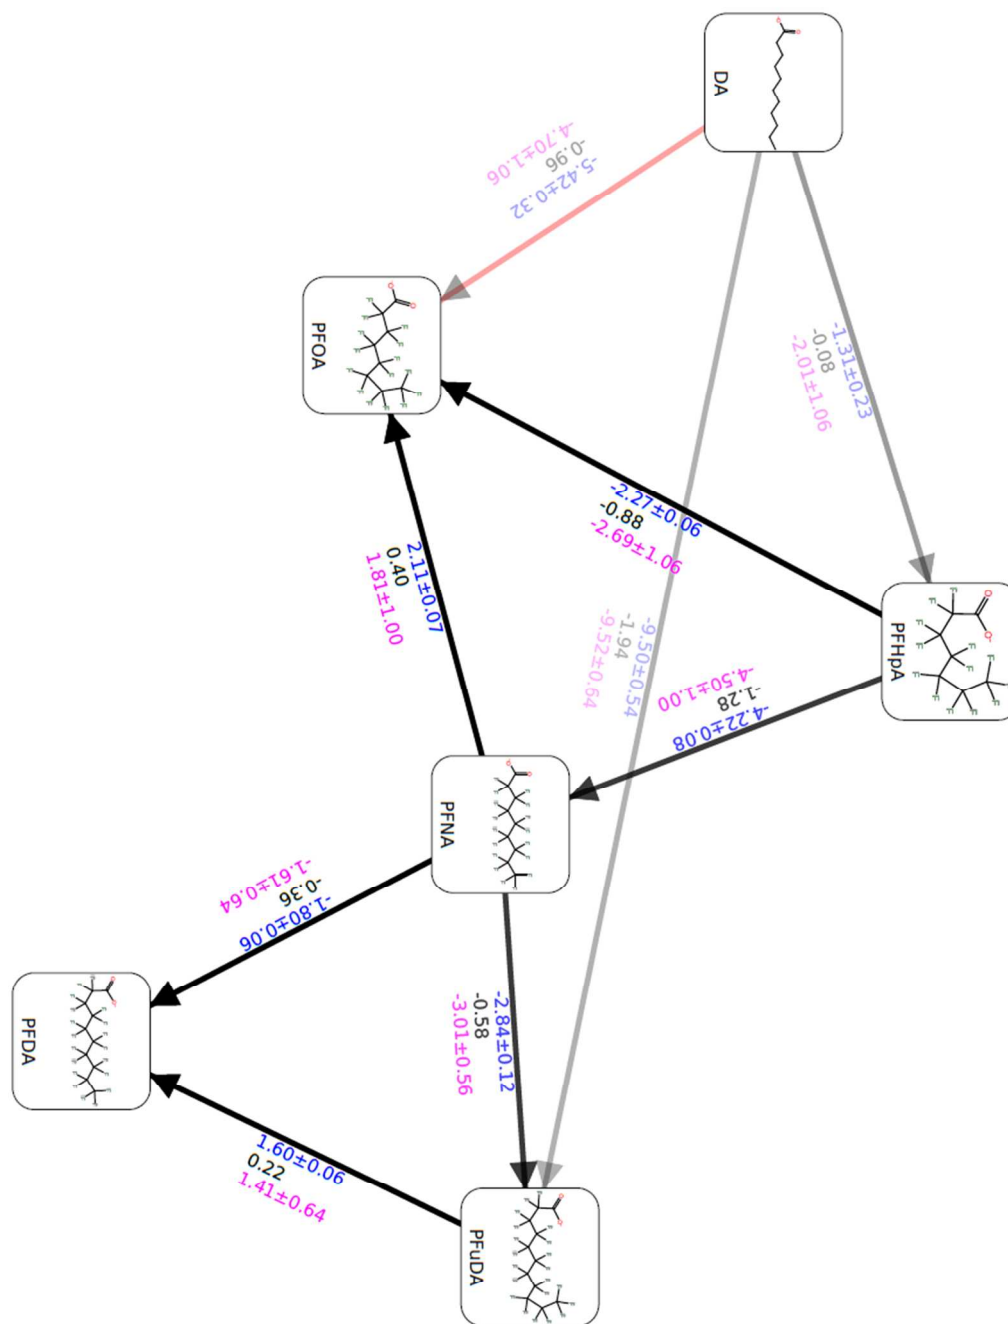

**Figure S8.** The FEP+ results based on the cMD derived structure for the PFuDA-PPAR $\gamma$  complex and original FEP+ protocol. Predicted  $\Delta\Delta G$  values for each individual permutation are shown. The ligands experimental relative binding affinities  $\Delta\Delta G$  (kcal/mol), and the computed values by BAR (Bennett raw) and cycle closure estimation of  $\Delta\Delta G$  are written in black, blue and magenta color, respectively.
